# Supplementary material for: A highly selective and sensitive fluorescence ratiometric probe for cyanide and its application for the detection of cyanide in natural water and biological samples
Source: Royal Society of Chemistry journal article supplement (doi:10.1039/c3ay41475b), 2013-01-01
Supplement: c3ay41475b.pdf [file c3ay41475b.pdf]

*Supporting Information for*

**A highly selective and sensitive fluorescence ratiometric probe for cyanide and its application for detection of cyanide in natural water sample and biological sample**

Lingliang Long,<sup>\*a</sup> Liping Zhou,<sup>a</sup> Lin Wang,<sup>a</sup> Suci Meng,<sup>a</sup> Aihua Gong,<sup>b</sup> Fengyi Du,<sup>b</sup>  
and Chi Zhang<sup>\*a</sup>

<sup>a</sup> Functional Molecular Materials Research Centre, Scientific Research Academy & School of Chemistry and Chemical Engineering, Jiangsu University, Zhenjiang, Jiangsu 212013 (P. R. China).

<sup>b</sup> School of Medical Science and Laboratory Medicine, Jiangsu University, Zhenjiang, Jiangsu 212013, (P. R. China).

Email: Linglianglong@gmail.com; Chizhang@ujs.edu.cn.

## Table of contents

|                                                       | page  |
|-------------------------------------------------------|-------|
| Materials and instruments                             | S3    |
| Scheme S1                                             | S4    |
| Synthesis                                             | S4-S5 |
| Measurement procedures                                | S5    |
| Determination of fluorescence quantum yield           | S5    |
| Determination of the detection limit                  | S5    |
| Detection of cyanide in natural water sample          | S5    |
| Detection of endogenous biological cyanide in cassava | S6    |
| Figure S1                                             | S6    |
| Figure S2                                             | S7    |
| Figure S3                                             | S7    |
| Figure S4                                             | S8    |
| Figure S5                                             | S8    |
| Figure S6                                             | S9    |
| Figure S7                                             | S9    |
| Figure S8                                             | S9    |
| Figure S9                                             | S10   |
| Figure S10                                            | S10   |
| Figure S11                                            | S11   |
| Figure S12                                            | S11   |
| Figure S13                                            | S12   |
| Figure S14                                            | S12   |
| Table S1                                              | S13   |
| Figure S15                                            | S13   |
| Figure S16                                            | S14   |
| Figure S17                                            | S14   |
| Figure S18                                            | S15   |
| References                                            | S15   |

**Materials and instruments:** Unless otherwise stated, all reagents were purchased from commercial suppliers and used without further purification. Solvents were purified and dried by standard methods prior to use. Twice-distilled water was used throughout all experiments. The solutions of various anions were prepared from their tetrabutylammonium salt. TLC analyses were performed on silica gel plates and column chromatography was conducted over silica gel (mesh 200-300), both of which were obtained from the Qingdao Ocean Chemicals. Melting points of compounds were measured on a Beijing Taike XT-4 microscopy melting point apparatus, and all melting points were uncorrected. Mass spectra were recorded on a LXQ Spectrometer (Thermo Scientific) operating on ESI.  $^1\text{H}$  and  $^{13}\text{C}$ -NMR spectra were recorded on a Bruker Avance 400 spectrometer operating at 400 MHz and 100 MHz respectively. Elemental (C, H, N) analysis were carried out using Flash EA 1112 analyzer. Electronic absorption spectra were obtained on a SHIMADZU UV-2450 spectrometer. Fluorescence spectra were measured on a Photon Technology International (PTI) Quantamaster fluorometer with 3 nm excitation and emission slit widths. The pH measurements were performed with a pH-3c digital pH-meter (Shanghai ShengCi Device Works, Shanghai, China) with a combined glass-calomel electrode.

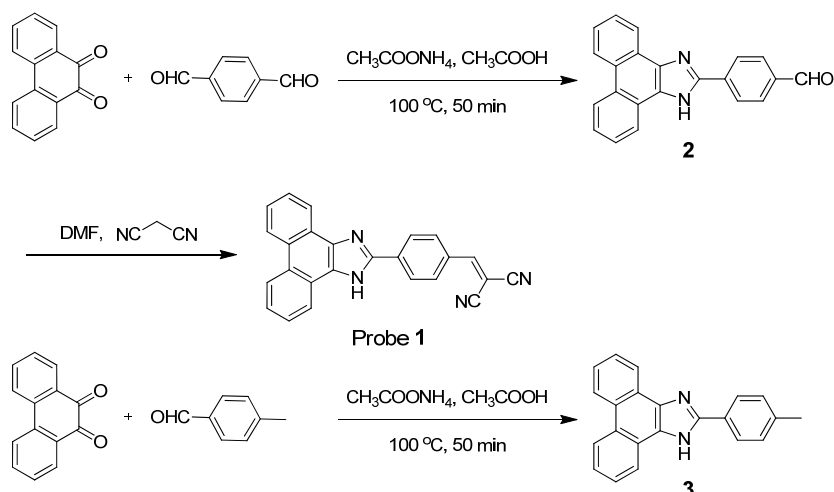

**Scheme S1.** Synthesis of the probe 1 and reference compound 3.

### Synthesis of 4-(1*H*-phenanthro[9,10-*d*]imidazol-2-yl)benzaldehyde (2):

Terephthalaldehyde (402 mg, 3 mmol), 9,10-phenanthroquinone (208 mg, 1 mmol), and ammonium acetate (1.54 g, 20 mmol) were added in glacial AcOH (10 mL), and then the mixture was heated to 100 °C for 50 min. The hot solution was cooled to room temperature, and the resulting precipitate was collected by filtration and washed with acetate acid, dilute sodium hydrogen carbonate solution, and water. After dried under reduced vacuum, the precipitate was further purified by column chromatography on silica gel (acetone) to afford the compound 2 as yellow solid (245.9 mg, 76.3%). Mp: > 300°C. <sup>1</sup>H NMR (DMSO-*d*<sub>6</sub>, 400MHz), δ (ppm): 7.67 (m, 2H), 7.77 (m, 2H), 8.14 (d, *J* = 8.4 Hz, 2H), 8.53 (d, *J* = 8.4 Hz, 2H), 8.57 (d, *J* = 7.6 Hz, 1H), 8.63 (d, *J* = 7.6 Hz, 1H), 8.86 (d, *J* = 8.4 Hz, 1H), 8.90 (d, *J* = 8.4 Hz, 1H), 10.10 (s, 1H). MS (ESI) *m/z* 323.1 [M+H]<sup>+</sup>.

### Synthesis of 2-(4-(1*H*-phenanthro[9,10-*d*]imidazol-2-yl)benzylidene)malononitrile (1):

A mixture of compound 2 (150 mg, 0.46 mmol), malononitrile (0.5 mL, 7.94 mmol), dry DMF (10 mL) was stirred overnight under N<sub>2</sub> atmosphere at room temperature. After the solvent was removed under vacuum, the resulting mixture was purified by column chromatography on silica gel (CH<sub>2</sub>Cl<sub>2</sub>) to afford the compound 1 as orange solid (138.4 mg, 81.2%). Mp: > 300°C. <sup>1</sup>H NMR (DMSO-*d*<sub>6</sub>, 400MHz), δ (ppm): 7.68 (m, 2H), 7.77 (m, 2H), 8.10 (d, *J* = 8.4 Hz, 2H), 8.47 (d, *J* = 8.4 Hz, 2H), 8.49 (s, 1H), 8.57 (d, *J* = 7.6 Hz, 1H), 8.60 (d, *J* = 7.6 Hz, 1H), 8.85 (d, *J* = 8.4 Hz, 1H), 8.89 (d, *J* = 8.4 Hz, 1H). <sup>13</sup>C NMR (DMSO-*d*<sub>6</sub>, 100 MHz), δ (ppm): 81.5, 113.8, 114.8, 122.6, 124.5, 126.3, 126.9, 127.8, 128.5, 131.7, 131.9, 135.5, 147.8, 160.7. MS (ESI) *m/z* 369.68 [M-H]<sup>-</sup>. Elemental analysis calcd (%) for C<sub>25</sub>H<sub>14</sub>N<sub>4</sub>: C 81.06, H 3.81, N 15.13; found C 80.89, H 3.83, N 15.08.

### Synthesis of 2-(*p*-tolyl)-1*H*-phenanthro[9,10-*d*]imidazole (3):

*p*-Tolualdehyde (120 mg, 1 mmol), 9,10-phenanthroquinone (208 mg, 1 mmol), and ammonium acetate (1.54 g, 20 mmol) were added in glacial AcOH (10 mL), and

then the mixture was heated to 100 °C for 50 min. After cooling to room temperature, the solution was poured into water (50mL), and the white precipitate was collected by filtration. The crude product was purified by column chromatography on silica gel (dichloromethane: petroleum ether = 4:1, v/v) to afford the compound **3** as white solid (181.9 mg, 59%). Mp: 290-292 °C. <sup>1</sup>H NMR (Acetone-*d*<sub>6</sub>, 400MHz), δ (ppm): 2.42 (s, 3 H), 7.38 (d, *J* = 8.0 Hz, 2H), 7.62-7.74 (m, 4 H), 8.25 (d, *J* = 8.0 Hz, 2H), 8.49 (d, *J* = 7.6 Hz, 1H), 8.75 (d, *J* = 8.0 Hz, 1H), 8.84 (d, *J* = 8.0 Hz, 1H), 8.88 (d, *J* = 8.4 Hz, 1H). MS (ESI) *m/z* 309.1 [M+H]<sup>+</sup>.

**Measurement procedures:** A stock solution of probe **1** was prepared at 2.5×10<sup>-4</sup> M in CH<sub>3</sub>CN, and a stock solution of various anions (1×10<sup>-3</sup> M) was prepared by dissolving an appropriate amount of anions in water. Test solutions in 20 mM potassium phosphate buffer/CH<sub>3</sub>CN (v/v 1: 4, pH 7.4) solution (5 mL) were prepared by placing 0.2 mL of probe **1** stock solution, 3.8 mL CH<sub>3</sub>CN, and an appropriate aliquot of each testing species stock into a 5 mL volumetric flask, and then diluting the solution to 5 mL with 20 mM potassium phosphate buffer (pH 7.4). The resulting solution was shaken well and incubated at room temperature for 10 min before recording the spectra.

**Determination of fluorescence quantum yield:** Fluorescence quantum yield was determined using the solutions of quinine sulfate (Φ<sub>F</sub> = 0.546 in 1N H<sub>2</sub>SO<sub>4</sub>)<sup>1</sup> as a standard. The quantum yield was calculated using the following equation:<sup>2-4</sup>

$$\Phi_{F(X)} = \Phi_{F(S)} (A_S F_X / A_X F_S) (n_X / n_S)^2$$

Where Φ<sub>F</sub> is the fluorescence quantum yield, *A* is the absorbance at the excitation wavelength, *F* is the area under the corrected emission curve, and *n* is the refractive index of the solvents used. Subscripts S and X refer to the standard and to the unknown, respectively.

**Determination of the detection limit:** The detection limit was determined from fluorescence titration data based on a reported method.<sup>5-9</sup> According to the result of titration experiment, the graph of (I<sub>min</sub>-I) / (I<sub>min</sub>-I<sub>max</sub>) versus log [CN<sup>-</sup>] was plotted, where the I is the fluorescence intensity at 458 nm, I<sub>min</sub> and I<sub>max</sub> are the minimum and maximum fluorescence intensity at 458 nm respectively. A linear regression curve was then fitted (Fig. S4), and the intercept of the line at x-axis was taken as detection limit.

**Detection of cyanide in natural water sample:** The crude water samples from Yangtzi River, pond water and tap water were filtered through microfiltration membrane before use. For determination of CN<sup>-</sup> in water samples, the pH value of the water samples was firstly adjusted to 7.4 by addition of aliquot aqueous sodium hydroxide or hydrochloric acid, and then diluting 4 mL of probe **1** (12.5 μM) in CH<sub>3</sub>CN with the water samples to 5 mL in a 5 mL volumetric flask. The resulting

solution was shaken well and incubated for 10 min at room temperature. After that, the emission ratio ( $I_{458}/I_{618}$ ) was recorded. The  $\text{CN}^-$  in these water samples was not detected. Next, the water samples were spiked with standard  $\text{CN}^-$  solutions at different concentration levels and then analyzed with probe **1**, the results are shown in Table S1.

**Detection of endogenous biological cyanide in cassava:** The extraction of cyanide from the bitter cassava root was according to a reported procedure.<sup>10</sup> Fresh peeled cassava roots were well crushed and stored in a sealed tube for 60 min at room temperature to release the cyanide. Then, 2 g of finely crushed material was diluted with 10 mL of water and centrifuged at 10000 r/min for 10 min. The supernatant as cassava extract were used for further analysis.

Aliquots of the cassava extract (0  $\mu\text{L}$ , 20  $\mu\text{L}$ , 40  $\mu\text{L}$ , 60  $\mu\text{L}$ , 80  $\mu\text{L}$ , or 100  $\mu\text{L}$ ) were added to 4 mL probe **1** solution (12.5  $\mu\text{M}$ , in  $\text{CH}_3\text{CN}$ ) in a 5 mL volumetric flask, and then diluting the solution to 5 mL with 20 mM potassium phosphate buffer (pH 7.4). After the resulting solution incubated at room temperature for 10 min, the emission ratios ( $I_{458}/I_{618}$ ) ( $\lambda_{\text{ex}}=370$  nm) were recorded.

The unknown content of cyanide in cassava sample was estimated by using the standard addition method with tetrabutylammonium cyanide ( $5 \times 10^{-3}$  M stock) as the standard. Different volumes of the  $\text{CN}^-$  stock (0, 1, 2, 3, or 4  $\mu\text{L}$ ) was added directly to a mixture of 4 mL probe **1** solution (12.5  $\mu\text{M}$ , in  $\text{CH}_3\text{CN}$ ) and 10  $\mu\text{L}$  cassava extract in a 5 mL volumetric flask, and then diluting the mixture to 5 mL with 20 mM potassium phosphate buffer (pH 7.4). The resulting solution was shaken well. After 10 min, the emission ratios ( $I_{458}/I_{618}$ ) ( $\lambda_{\text{ex}}=370$  nm) were recorded (Fig. S15). The content of cyanide in the cassava root was analyzed to be 123.4 mg/kg.

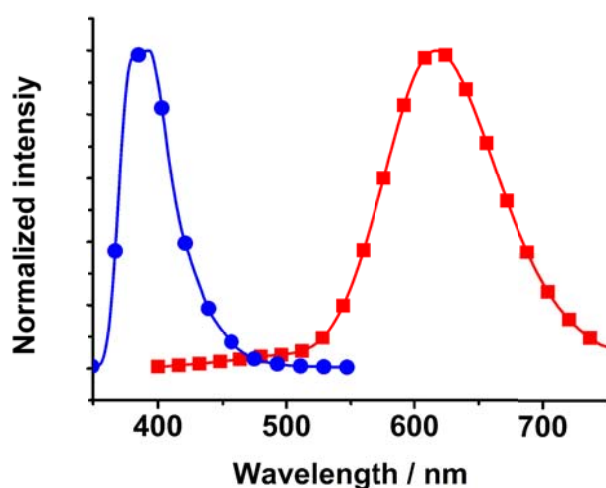

**Figure S1.** Normalized fluorescence emission spectra of probe **1** (■) and reference compound **3** (●) in 20 mM potassium phosphate buffer/ $\text{CH}_3\text{CN}$  (v/v 1: 4, pH 7.4), the excitation wavelength was at 370 and 326 nm respectively.

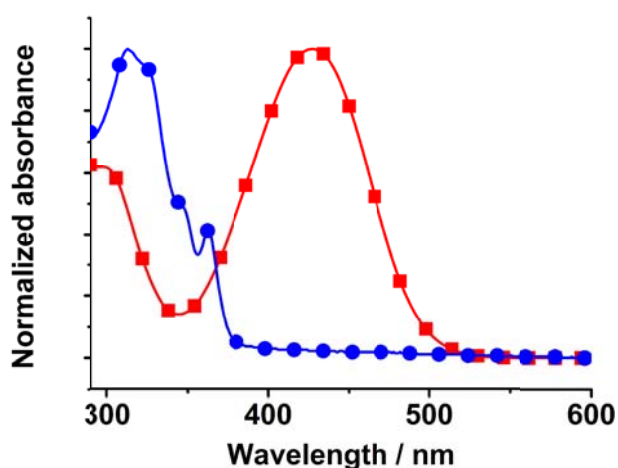

**Figure S2.** Normalized absorption spectra of probe **1** (■) and reference compound **3** (●) in 20 mM potassium phosphate buffer/CH<sub>3</sub>CN (v/v 1: 4, pH 7.4).

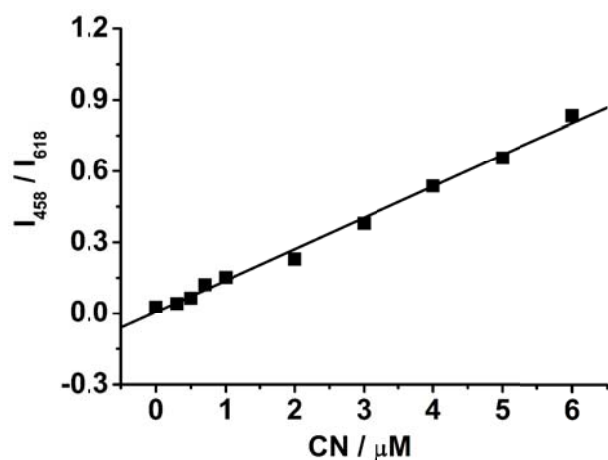

**Figure S3.** The emission ratio ( $I_{458}/I_{618}$ ) of probe **1** (10 μM) to various amount of CN<sup>-</sup> (0 to 6 μM). The data were acquired after incubation of probe **1** with CN<sup>-</sup> for 10 min in 20 mM potassium phosphate buffer/CH<sub>3</sub>CN (v/v 1: 4, pH 7.4) at room temperature. Excitation was provided at 370 nm.

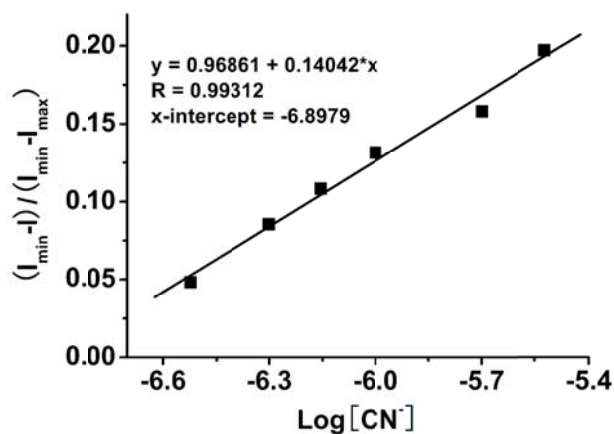

**Figure S4.** Plot of  $(I_{\min} - I) / (I_{\min} - I_{\max})$  versus  $\log [\text{CN}^-]$  for probe **1**. Calculated detection limit = 0.126  $\mu\text{M}$ .

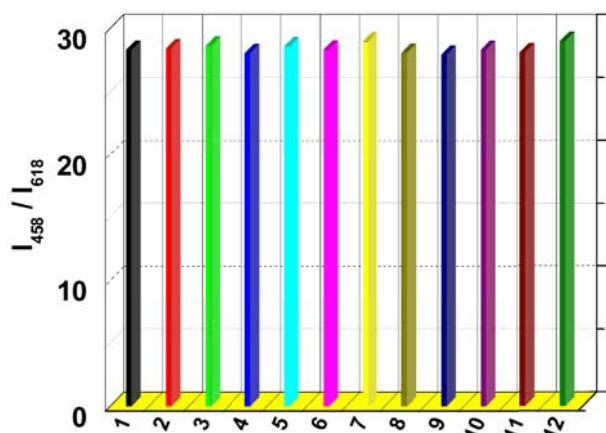

**Figure S5.** Fluorescence ratiometric response of probe **1** (10  $\mu\text{M}$ ) to 20  $\mu\text{M}$  of  $\text{CN}^-$  in the presence of 20  $\mu\text{M}$  of other anions. 1) blank; 2)  $\text{F}^-$ ; 3)  $\text{Cl}^-$ ; 4)  $\text{Br}^-$ ; 5)  $\text{I}^-$ ; 6)  $\text{HSO}_3^-$ ; 7)  $\text{CH}_3\text{COO}^-$ ; 8)  $\text{ClO}_4^-$ ; 9)  $\text{H}_2\text{PO}_4^-$ ; 10)  $\text{HCO}_3^-$ ; 11)  $\text{NO}_3^-$ ; 12)  $\text{SCN}^-$ . The excitation wavelength was 370 nm.



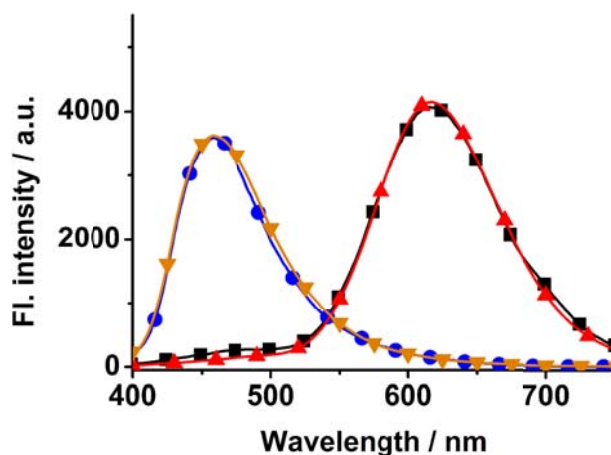

**Figure S6.** The fluorescence emission spectra of probe **1** (10 μM) (▲), probe **1** (10 μM) + 2-mercaptoethanol (20 μM) (■), probe **1** (10 μM) + CN<sup>-</sup> (20 μM) (▼), and probe **1** (10 μM) + 2-mercaptoethanol (20 μM) + CN<sup>-</sup> (20 μM) (●). The spectra were performed in 20 mM potassium phosphate buffer/CH<sub>3</sub>CN (v/v 1: 4, pH 7.4). The excitation wavelength was 370 nm.

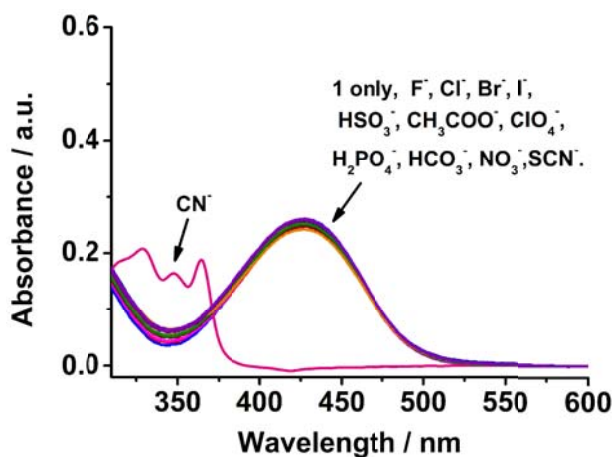

**Figure S7.** Absorption spectra of probe **1** (10 μM) in the presence of various anions (20 μM) in 20 mM potassium phosphate buffer/CH<sub>3</sub>CN (v/v 1: 4, pH 7.4) at room temperature.

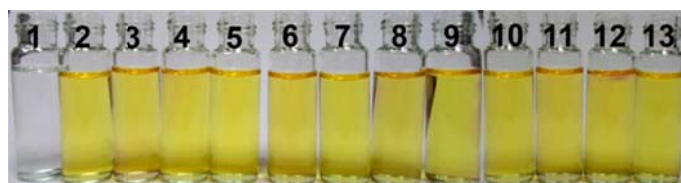

**Figure S8.** Visible color changes of probe **1** (10 μM) in the presence of various anions (20 μM). 1) CN<sup>-</sup>; 2) blank; 3) F<sup>-</sup>; 4) Cl<sup>-</sup>; 5) Br<sup>-</sup>; 6) I<sup>-</sup>; 7) HSO<sub>3</sub><sup>-</sup>; 8) CH<sub>3</sub>COO<sup>-</sup>; 9) ClO<sub>4</sub><sup>-</sup>; 10) H<sub>2</sub>PO<sub>4</sub><sup>-</sup>; 11) HCO<sub>3</sub><sup>-</sup>; 12) NO<sub>3</sub><sup>-</sup>; 13) SCN<sup>-</sup>.

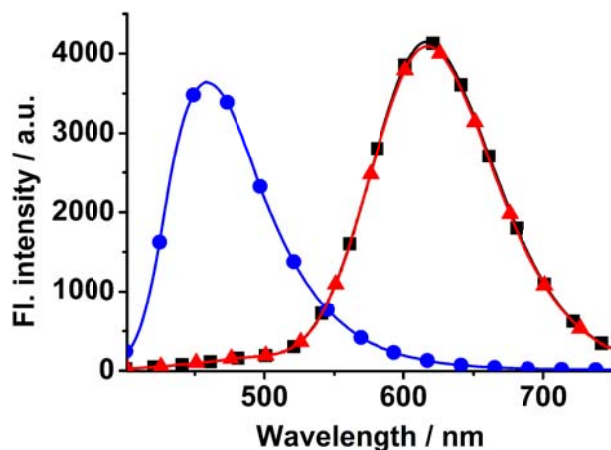

**Figure S9.** The fluorescence spectra ( $\lambda_{\text{ex}} = 370$  nm) of probe **1** ( $10 \mu\text{M}$ ) in 20 mM potassium phosphate buffer/ $\text{CH}_3\text{CN}$  (v/v 1: 4, pH 7.4) kept for 0.5 hour (■) and for 1 day (▲). For comparison, the fluorescence spectrum of probe **1** with addition of  $\text{CN}^-$  ( $20 \mu\text{M}$ ) for 10 min was also showed (●).

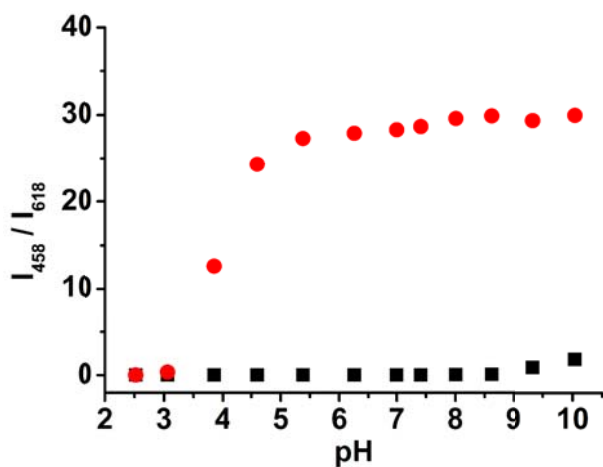

**Figure S10.** The variations of emission ratio of probe **1** ( $10 \mu\text{M}$ ) in the absence (■) or presence (●) of  $\text{CN}^-$  ( $20 \mu\text{M}$ ) as a function of pH. Excitation wavelength was 370 nm.

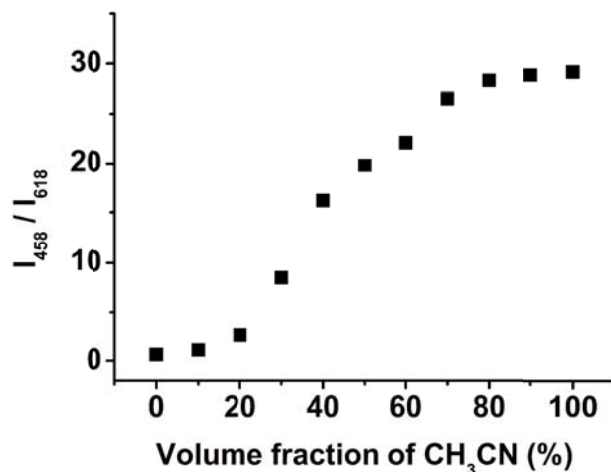

**Figure S11.** The effect of CH<sub>3</sub>CN volume fraction on ratiometric response of probe **1** (10 μM) to CN<sup>-</sup> (20 μM). The data were acquired after incubation of probe **1** with CN<sup>-</sup> for 10 min at room temperature. Excitation was provided at 370 nm, and the ratio of emission intensities at 458 and 618 nm were measured.

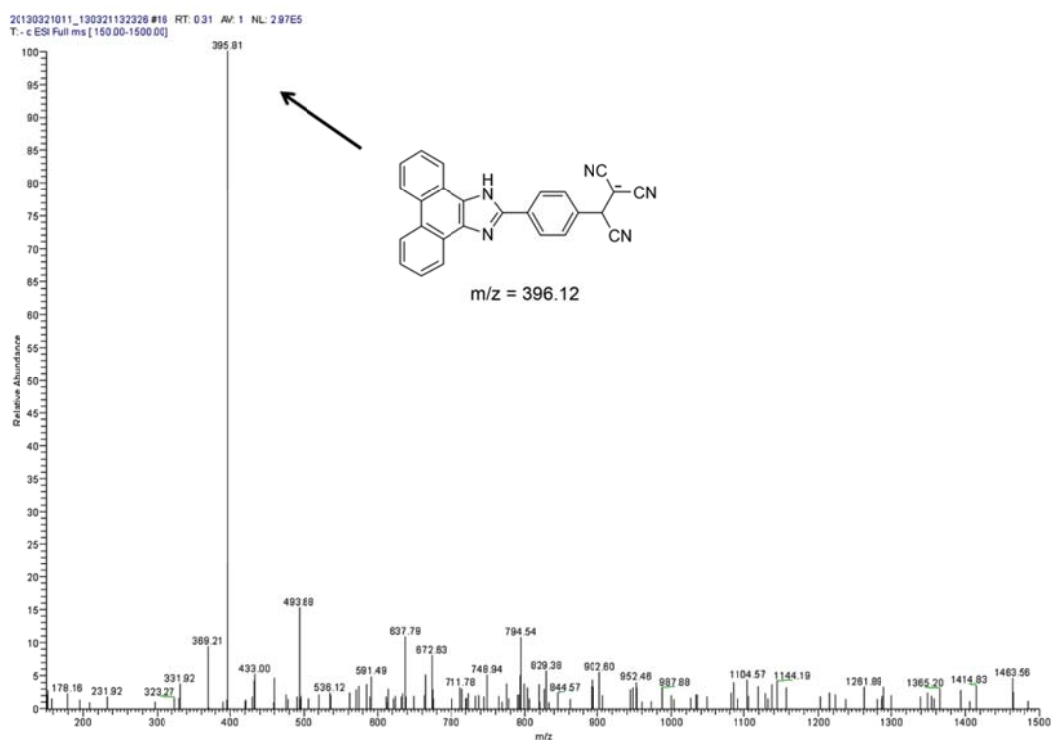

**Figure S12.** The ESI-MS spectra of the probe **1** + CN<sup>-</sup>.

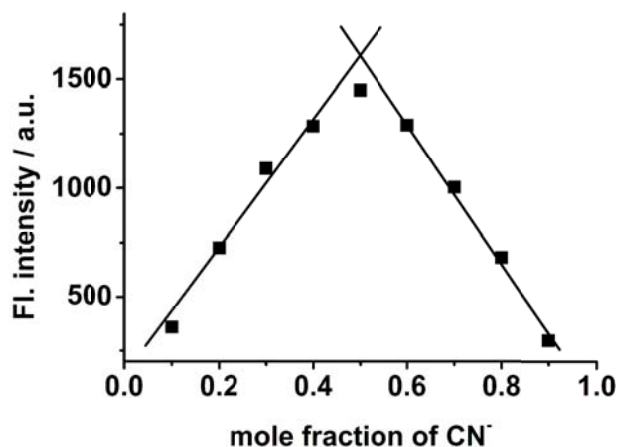

**Figure S13.** Job plot of the reaction between **1** and  $\text{CN}^-$  in 20 mM potassium phosphate buffer/ $\text{CH}_3\text{CN}$  (v/v 1: 4, pH 7.4). The variation of the emission at 458 nm was plotted as a function of the mole fraction of  $\text{CN}^-$ .

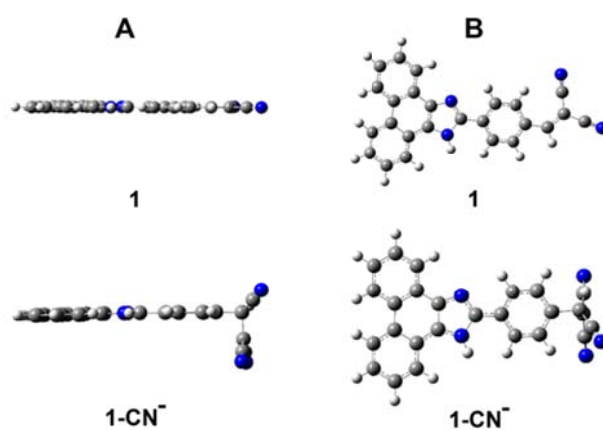

**Figure S14.** Optimized ground-state geometries of the probe **1** and **1-CN<sup>-</sup>**. A) The side-view; B) The top-view.

**Table S1.** Determination of  $\text{CN}^-$  concentrations in natural water samples.

| Sample          | $\text{CN}^-$ spiked ( $\text{mol L}^{-1}$ ) | $\text{CN}^-$ recovered ( $\text{mol L}^{-1}$ ) <sup>a</sup> | Recovery (%) |
|-----------------|----------------------------------------------|--------------------------------------------------------------|--------------|
| Yangtzi River 1 | 0                                            | Not detected                                                 | -            |
| Yangtzi River 2 | $2.00 \times 10^{-6}$                        | $(2.06 \pm 0.05) \times 10^{-6}$                             | 103.0        |
| Yangtzi River 3 | $2.00 \times 10^{-5}$                        | $(2.01 \pm 0.03) \times 10^{-5}$                             | 100.5        |
| Pond water 1    | 0                                            | Not detected                                                 | -            |
| Pond water 2    | $2.00 \times 10^{-6}$                        | $(1.98 \pm 0.02) \times 10^{-6}$                             | 99.0         |
| Pond water 3    | $2.00 \times 10^{-5}$                        | $(2.03 \pm 0.03) \times 10^{-5}$                             | 101.5        |
| Tap water 1     | 0                                            | Not detected                                                 | -            |
| Tap water 2     | $2.00 \times 10^{-6}$                        | $(2.04 \pm 0.03) \times 10^{-6}$                             | 102.0        |
| Tap water 3     | $2.00 \times 10^{-5}$                        | $(1.95 \pm 0.04) \times 10^{-5}$                             | 97.5         |

<sup>a</sup> Relative standard deviations were calculated based on three times of measurement.

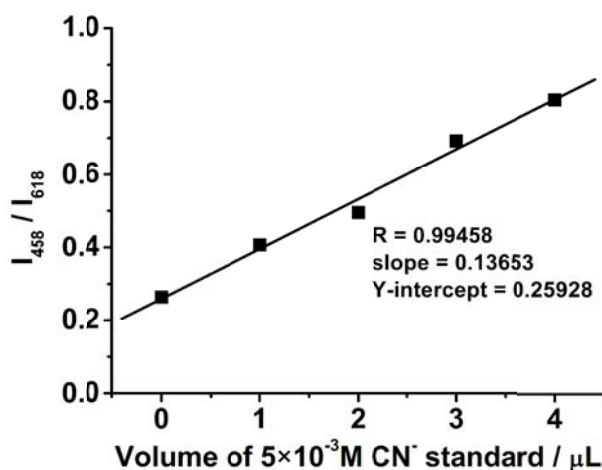

**Figure S15.** The ratiometric response ( $I_{458}/I_{618}$ ) of probe **1** (10  $\mu\text{M}$ ) to 10  $\mu\text{L}$  cassava extract including different volumes (0, 1, 2, 3, or 4  $\mu\text{L}$ ) of standard  $\text{CN}^-$  stock ( $5 \times 10^{-3}$  M). Excitation was provided at 370 nm.

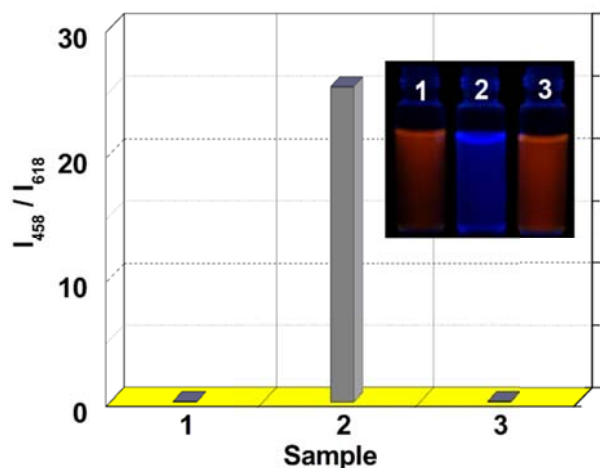

**Figure S16.** Ratiometric response of 5 mL probe **1** (10 $\mu$ M, in 20 mM potassium phosphate buffer/CH<sub>3</sub>CN (v/v 1: 4, pH 7.4)) in the presence of various samples. Sample 1: 0.1 mL potassium phosphate buffer; sample 2: 0.1 mL cassava extract; sample 3: 0.1 mL heat-treated cassava extract. Inset: visual fluorescence color changes of probe **1** (10  $\mu$ M) in the presence of above mentioned samples.

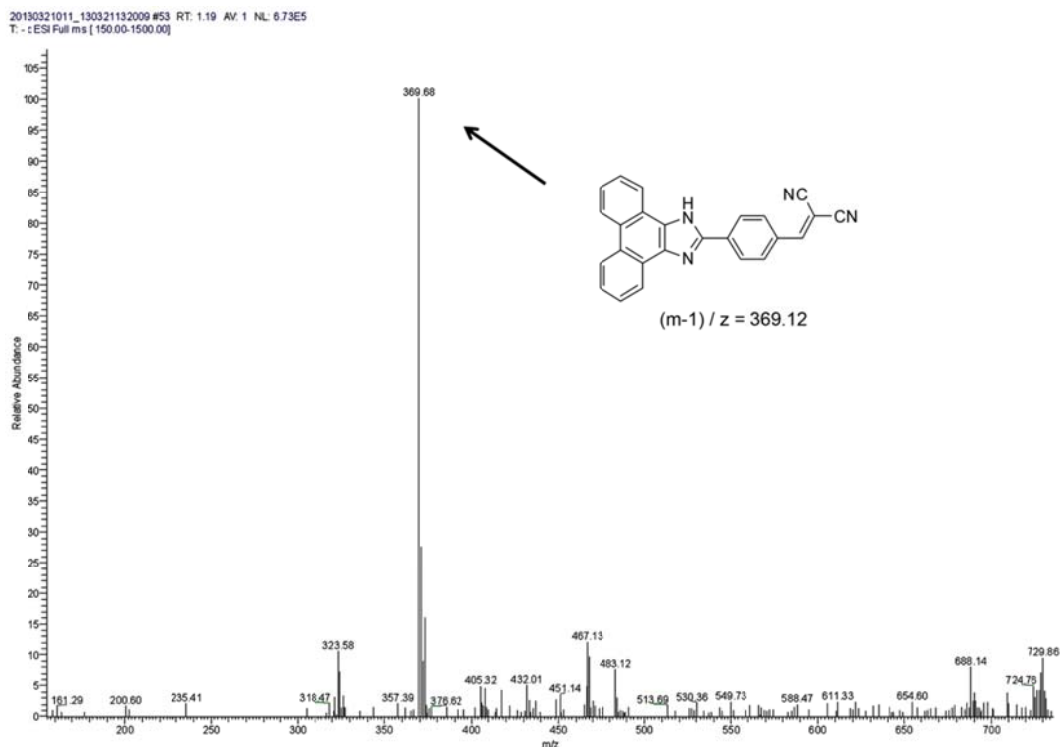

**Figure S17.** ESI-MS spectra of probe **1**.

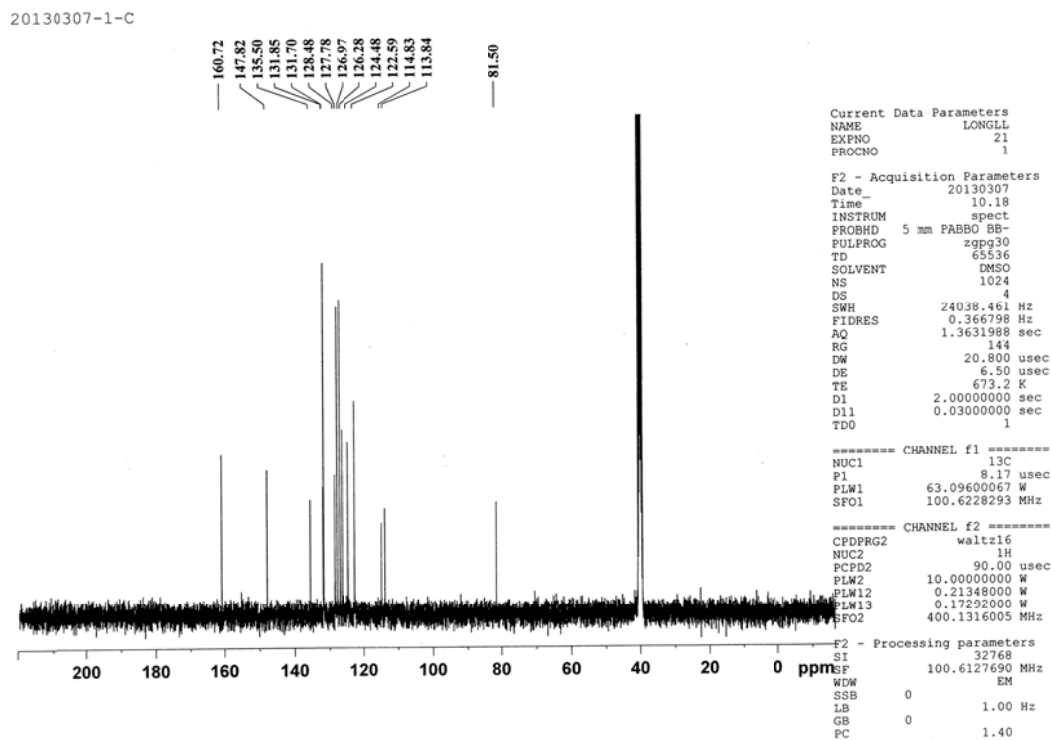

Figure S18.  $^{13}\text{C}$  NMR spectra of probe 1.

## References

1. J. N. Demas, G. A. Crosby, *J. Phys. Chem.*, 1971, **75**, 991-1024.
2. C. A. Parker, W. T. Rees, *Analyst*, 1960, **85**, 587-600.
3. S. F. Forgues, D. Lavabre, *J. Chem. Educ.*, 1999, **76**, 1260-1264.
4. A. Ajayaghosh, P. Carol, S. Sreejith, *J. Am. Chem. Soc.*, 2005, **127**, 14962-14963.
5. M. Shortreed, R. Kopelman, M. Kuhn, B. Hoyland, *Anal. Chem.*, 1996, **68**, 1414-1418.
6. A. Caballero, R. Martínez, V. Lloveras, I. Ratera, J. Vidal-Gancedo, K. Wurst, A. Tarraga, P. Molina, J. Veciana, *J. Am. Chem. Soc.*, 2005, **127**, 15666-15667.
7. W. Lin, L. Long, W. Tan, *Chem. Commun.*, 2010, **46**, 1503-1505.
8. W. Chen, W. Gong, Z. Ye, Y. Lin, G. Ning, *Dalton Trans.*, 2013, **42**, 10093-10096.
9. B. Chandra, S. P. Mahanta, N. N. Pati, S. Baskaran, R. K. Kanaparthi, C. Sivasankar, P. K. Panda, *Org. Lett.*, 2013, **15**, 306-309.
10. C. Männel-Croisé, B. Probst, F. Zelder, *Anal. Chem.*, 2009, **81**, 9493-9498.
